# Supplementary material for: Copolymerization of urea and murexide for efficient photocatalytic hydrogen evolution and tetracycline degradation
Source: Royal Society of Chemistry journal article supplement (doi:10.1039/d0nj05647b), 2020-12-21
Supplement: d0nj05647b1.pdf [file d0nj05647b1.pdf]

# Electronic Supplementary Material (ESI) For New Journal of Chemistry

## Copolymerization of urea and murexide for efficient photocatalytic hydrogen evolution and tetracycline degradation

Zhilu Du,<sup>a</sup> Xinyu Zhao,<sup>a</sup> Yingnan Zhao,<sup>a</sup> Huiying Sun,<sup>a</sup> Yingqi Li,<sup>a,\*</sup> Xin Wang,<sup>a</sup> Tianyu Qiu,<sup>a</sup> Xia Zhao,<sup>a</sup> Tingting Song,<sup>a</sup> Huaqiao Tan<sup>\*a</sup>

<sup>a</sup>Key Laboratory of Polyoxometalate Science of Ministry of Education, Faculty of Chemistry, Northeast Normal University, Ren Min Street No. 5268, Changchun, Jilin 130024, P. R. China.

\* Corresponding authors

*E-mail:* [andyli24@outlook.com](mailto:andyli24@outlook.com); [tanhq870@nenu.edu.cn](mailto:tanhq870@nenu.edu.cn)

## Characterization

The X-ray diffraction (XRD) patterns were recorded on a Bruker AXS D8 Focus with Cu K $\alpha$  radiation ( $\lambda = 1.54056 \text{ \AA}$ ). The measurements were scanned over a range of  $5^\circ$  to  $50^\circ$  ( $2\theta$ ) with a step size  $20^\circ$ . Transmission electron microscopy (TEM) and high-resolution transmission electron microscopy (HRTEM) images were obtained with a JEM-2100F microscope at an acceleration voltage of 200 kV. The scanning electron microscope (SEM) images were performed on a JEOL JSM 4800F SEM. EDS was used to measure the species and contents of component elements of the samples. Fourier transform infrared (FTIR) spectra were obtained using a Nicolet iS10 FTIR spectrometer. Elemental analysis (C, N) was achieved by a Vario EL cube microanalyzer. The optical absorption spectra of the samples were recorded in a UV-2600 UV-Vis spectrophotometer (Shimadzu). The UV-Vis diffuse reflectance spectra (DRS) employed BaSO<sub>4</sub> as a reference by UV-2600 spectrophotometer. The TC concentrations were also detected by UV-2600 UV-vis spectrophotometer at 360 nm wavelength. X-ray photoelectron spectroscopy (XPS) measurements were carried out on an ESCALABMKII spectrometer with an Al-K $\alpha$  achromatic X-ray source. The Brunauer-Emmett-Teller (BET) specific surface area was determined by nitrogen adsorption-desorption isotherm measurements at 77 K with a Micromeritics Autosorb IQ instrument. Photoluminescence (PL) spectra and transient PL lifetime were tested on a spectrometer (Horiba Jobin Yvon Fluorolog-3) with a QY2 accessory and a time-correlated single-photon counting lifetime spectroscopy system. The electron paramagnetic resonance (EPR) measurements were carried out on a JEOL JES-FA200 spectrometer.

## Electrochemical measurements

Electrochemical analysis was carried out using a CHI6082E electrochemical workstation in a conventional three electrode cell using a Pt plate and an Ag/AgCl electrode as counter electrode and reference electrode, respectively. Working electrodes were obtained as the following method: 30 mg of different catalysts was dispersed in solvent of 2 ml ethanol, and sonicated for 30 min to obtain a uniformly dispersed solution. Transferring photocatalyst suspensions onto a  $1 \times 2 \text{ cm}^2$  FTO conductive glass by a spin-coating method. Finally, the working electrode was air-dried at room temperature. The electrolyte was a 0.2 M Na<sub>2</sub>SO<sub>4</sub> solution. For photocurrent measurement (*i-t* curves), a 300 W (CEL-HXF300, AULIGHT) Xe lamp was utilized as the light source. For electrochemical impedance spectroscopy (EIS) experiment, frequency ranges from 0.01 Hz to 10 kHz at -0.2V, the others unchanged.

## Photocatalytic hydrogen evolution test

The photocatalytic reactions were carried out in a quartz reaction vessel connected to a closed gas circulation and evacuation system (CEL-SPH2N, CEAULIGHT). 10 mg of the photocatalyst powder was dispersed in 120 mL of aqueous solution containing triethanolamine (10 vol%) as the sacrificial electron donor. 3 wt.% Pt co-catalyst was photo-deposited by dissolving H<sub>2</sub>PtCl<sub>6</sub> in the above 120 mL reaction solution. The temperature of the reactant solution was kept at 283K by a flow of cooling antifreezing solution during the reaction. The suspension was thoroughly degassed and irradiated with a 300W Xe lamp (CEL-HXF300, AULTT) by attaching a 420nm cut-off filter at the light source. The evolved gases were analyzed by gas chromatography (GC-7900, CEAULIGHT) every 30 min equipped with a thermal conductive detector, using argon as the carrier gas. For the stability test, the reaction system was evacuated every 3 h and recycled for 5 runs. (15 h recycling experiment with intermittent evacuation every 3 h.

### Apparent quantum efficiency (AQE) measurement

The apparent quantum yield (AQE) for H<sub>2</sub> evolution was obtained by using the 400, 420, 450, 500, 550, and 600 nm band-pass filter. The AQE was estimated as follows:

$$\text{AQE (\%)} = \text{number of evolved H}_2 \text{ molecules} \times 2 \times 100 / \text{number of incident photons}$$

### Photocatalytic degradation of TC test

The photocatalytic degradation of tetracycline under visible light was used as a model to evaluate the photocatalytic performance of the samples. Visible light irradiation was achieved by a xenon lamp with a 420 nm cut-off filter. The device was connected to a circulating water-cooling system with a constant temperature of 25 °C. First, 20 ml of 20 ppm tetracycline solution and 20 mg of catalysts were placed in a beaker for ultrasonication and the reaction was in dark for 30 min under magnetic stirring to achieve adsorption-desorption equilibrium. Then the solution was illuminated for 2 h, 1 ml of suspension was taken every 20 min, centrifuged, and the supernatant was subjected to make a spectral test with an ultraviolet-visible spectrophotometer. Under the same conditions, the free radical trapping experiment was conducted by adding appropriate amounts of TEMPO, TEOA and IPA. TC and intermediates were monitored by LC-MS, which were obtained on an HP 6890GC-5973MSD mass spectrometer. A positive ionization electrospray ionization (ESI) source was used for spectrometer analysis in the m/z 100-500 range.

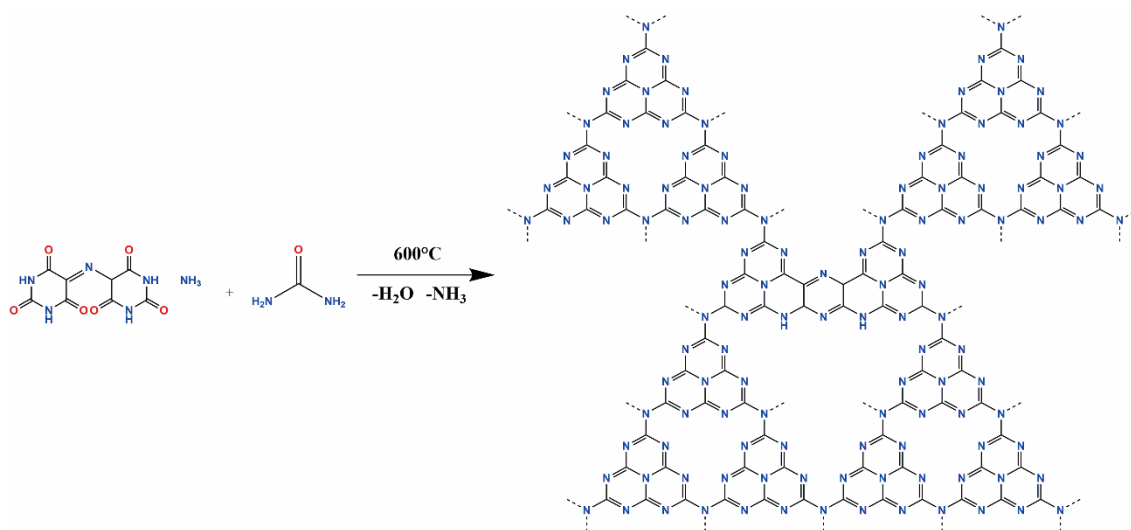

**Fig. S1** Schematic illustration of the formation process of M<sub>25</sub>CN.

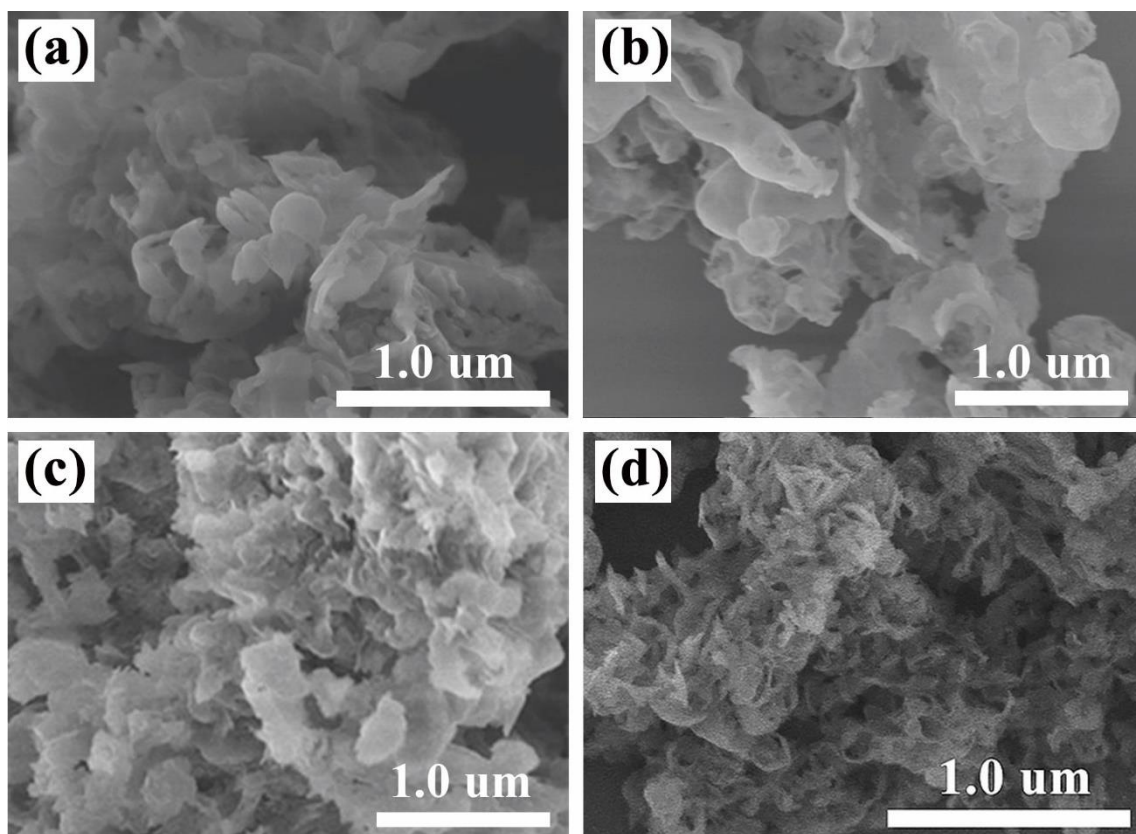

Fig. S2 SEM images of (a) M<sub>5</sub>CN (b) M<sub>15</sub>CN (c) M<sub>50</sub>CN (d) M<sub>100</sub>CN.

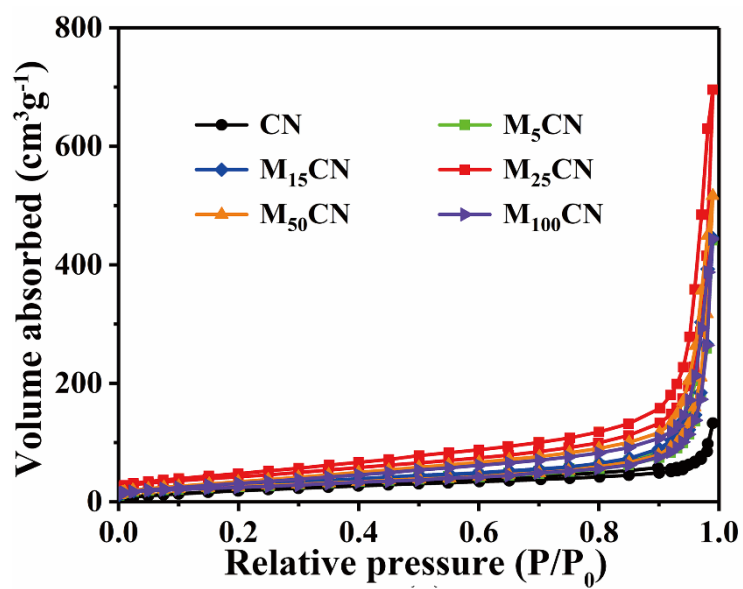

Fig. S3 Nitrogen adsorption-desorption isotherms of CN and M<sub>x</sub>CN.

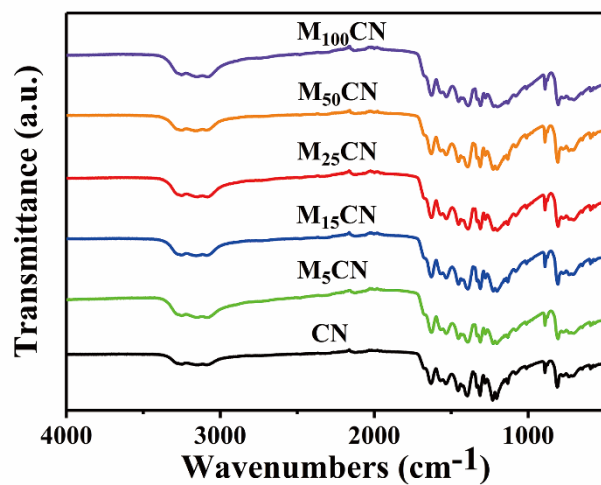

Fig. S4 FTIR spectra of CN and M<sub>x</sub>CN.

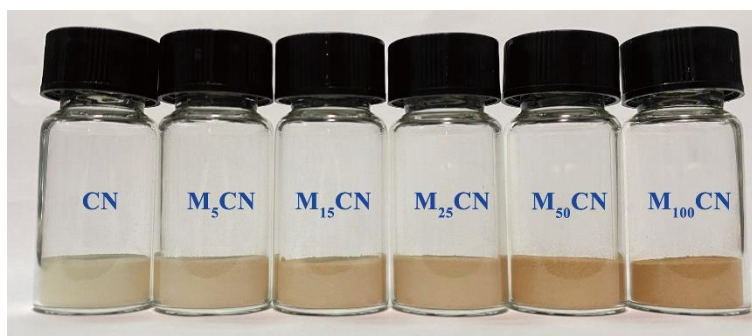

Fig. S5 The color of CN and M<sub>x</sub>CN.

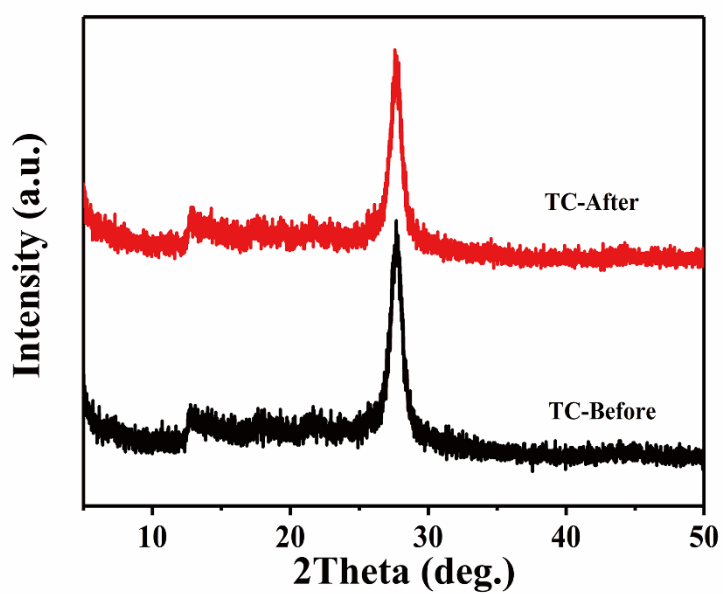

Fig. S6 XRD patterns of M<sub>25</sub>CN before and after photodegradation of TC.

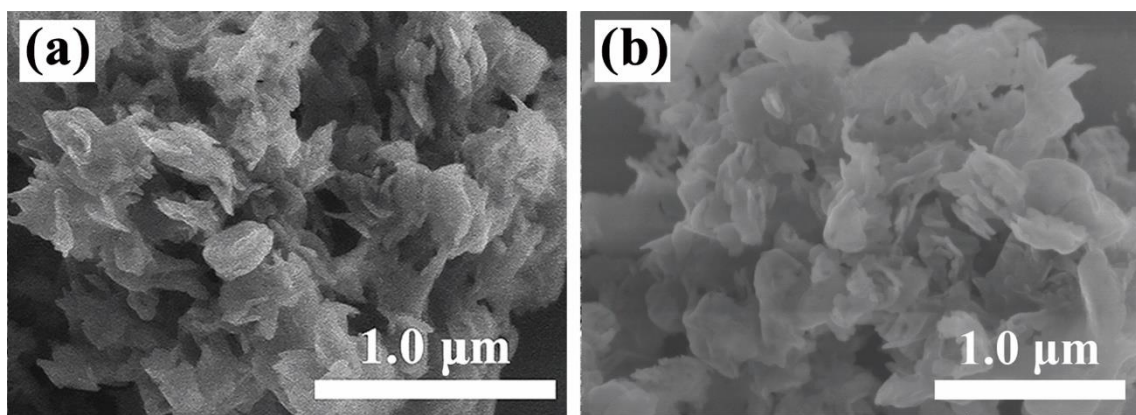

**Fig. S7** SEM images of M<sub>25</sub>CN before (a) and after (b) photodegradation of TC.

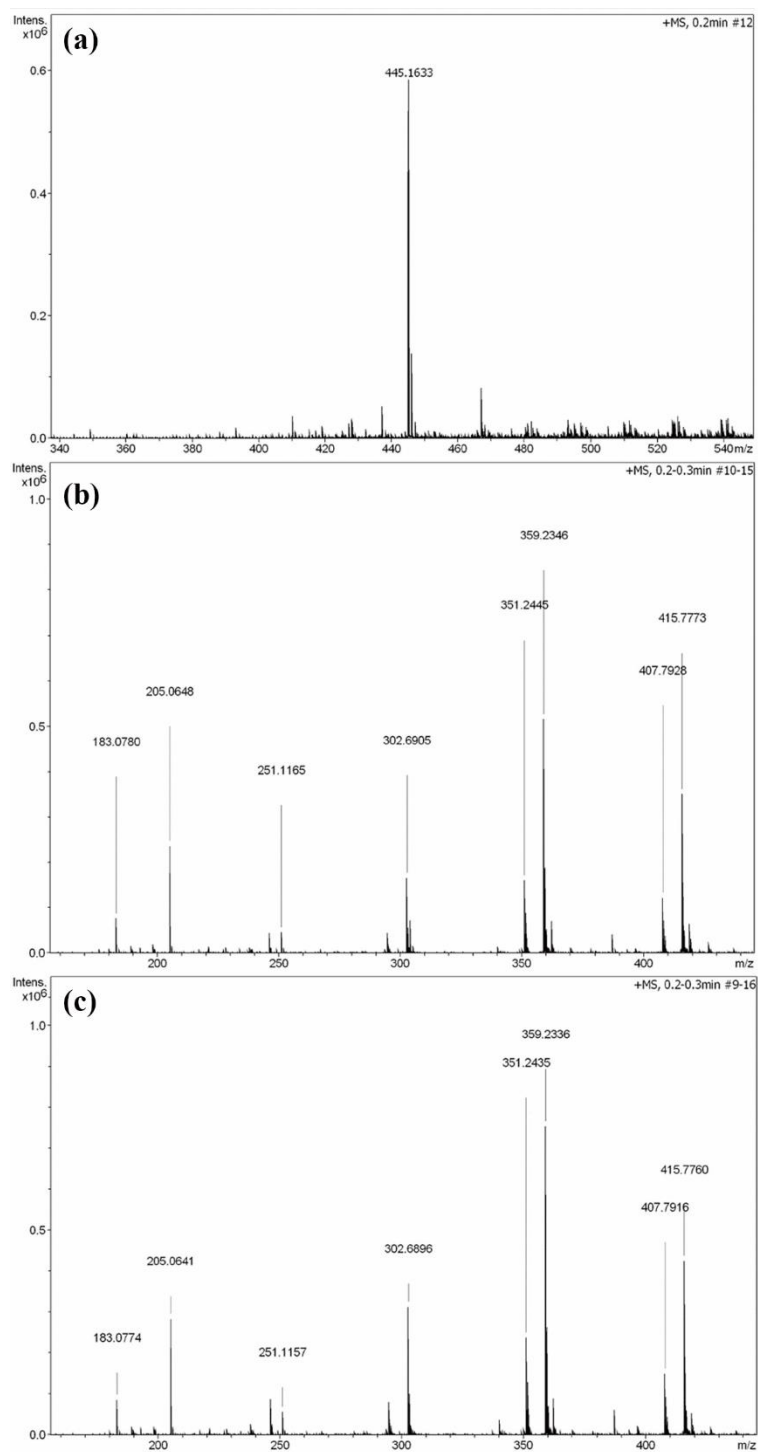

**Fig. S8** LC-MS full scan spectra of the main intermediates in TC degradation for (a) 0, (b) 60 and (c) 120 min by M<sub>25</sub>CN.

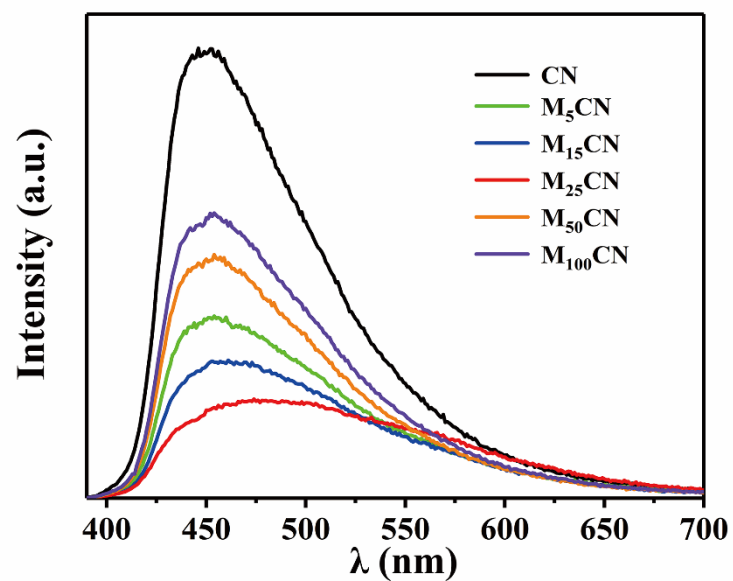

Fig. S9 PL emission spectra of CN and  $M_x$ CN ( $\lambda_{ex} = 370$  nm).

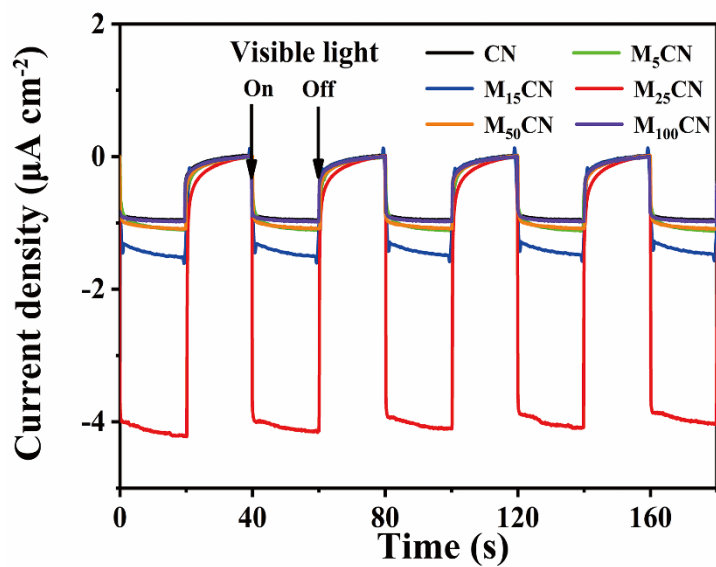

Fig. S10 (a) Photocurrent responses of CN and  $M_x$ CN with visible light irradiating ( $\lambda \geq 420$  nm).



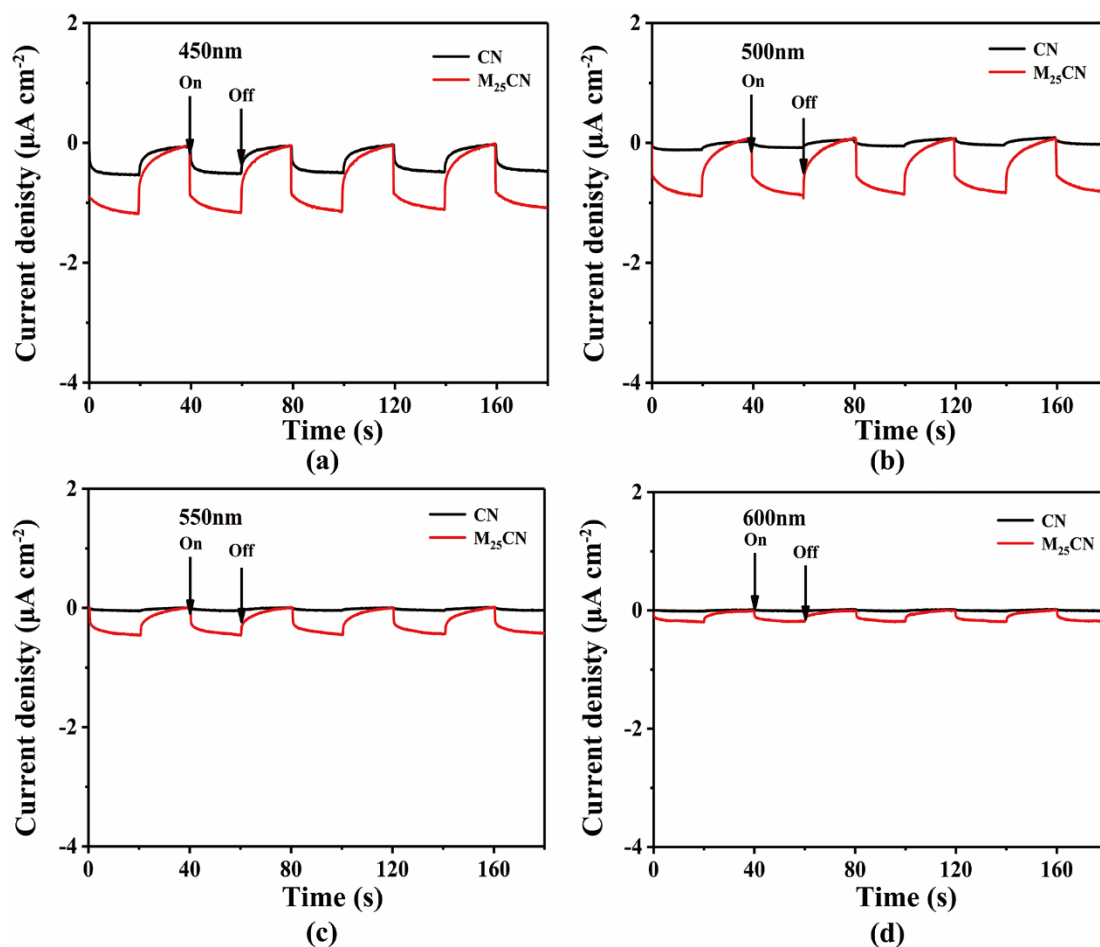

**Fig. S11** Transient photocurrents of CN and  $M_{25}\text{CN}$  at different wavelength bands ( $\lambda = 450, 500, 550, 600 \text{ nm}$ ).

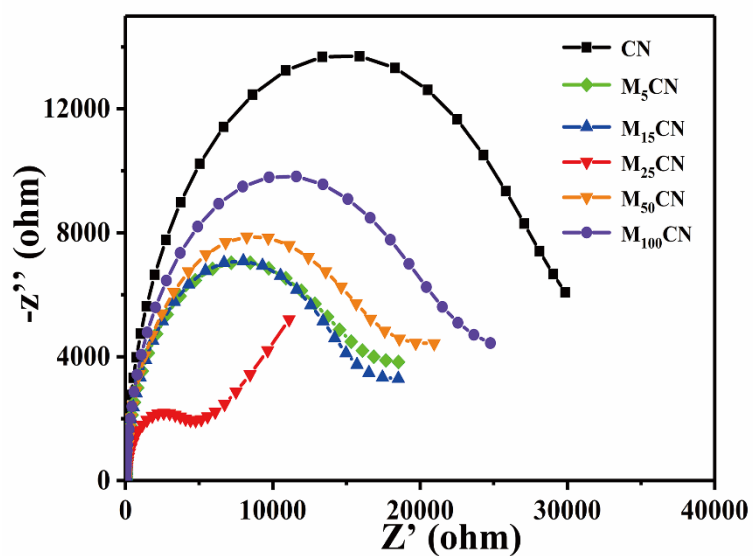

**Fig. S12** Electrochemical impedance spectroscopy plots of CN and  $M_x\text{CN}$  in the dark.

**Table S1** The BET surface areas of CN and M<sub>x</sub>CN.

| Sample                                        | CN    | M <sub>5</sub> CN | M <sub>15</sub> CN | M <sub>25</sub> CN | M <sub>50</sub> CN | M <sub>100</sub> CN |
|-----------------------------------------------|-------|-------------------|--------------------|--------------------|--------------------|---------------------|
| Surface area(m <sup>2</sup> g <sup>-1</sup> ) | 77.22 | 90.80             | 99.06              | 154.47             | 91.86              | 87.16               |

**Table S2** The elemental analysis data of CN and M<sub>25</sub>CN.

| Sample             | C/wt.% | N/wt.% | C/N  |
|--------------------|--------|--------|------|
| CN                 | 35.81  | 64.91  | 0.64 |
| M <sub>25</sub> CN | 37.68  | 62.55  | 0.70 |

**Table S3** Comparison of g-C<sub>3</sub>N<sub>4</sub>-based small molecule copolymers in photocatalytic hydrogen production (HER).

| Samples     | Amounts (mg) | HER (μmol h <sup>-1</sup> g <sup>-1</sup> ) | Wavelength (nm) | ref       |
|-------------|--------------|---------------------------------------------|-----------------|-----------|
| MCN         | 10           | 6120                                        | λ > 420         | This work |
| CNAL        | 100          | 2260                                        | 420 < λ < 780   | R1        |
| CNQ         | 100          | 4360                                        | 420 < λ < 780   | R2        |
| Pt/CNU-M    | 50           | 8000                                        | λ > 420         | R3        |
| CNB         | 100          | 294                                         | λ > 420         | R4        |
| CN-ABN      | 100          | 1470                                        | λ > 420         | R5        |
| Pt/CNU-ATCN | 50           | 14500                                       | λ > 420         | R6        |
| CNA         | 100          | 1310                                        | λ > 420         | R7        |
| V-CN        | 10           | 13600                                       | λ > 420         | R8        |

[R1] X. Q. Fan, L. X. Zhang, M. Wang, W. M. Huang, Y. J. Zhou, M. L. Li, R. L. Cheng and J. L. Shi, *Appl. Catal. B*, 2016, **182**, 68–73.

[R2] X. Q. Fan, L. X. Zhang, R. L. Cheng, M. Wang, M. L. Li, Y. J. Zhou and J. L. Shi, *ACS Catal.*, 2015, **5**, 5008-5015.

[R3] G. G. Zhang and X. C. Wang, *J. Catal.* 2013, **307**, 246-253.

[R4] J. S. Zhang, X. F. Chen, K. Maeda, K. Domen, J. D. Epping, X. Z. Fu, M. Antonietti and X. C. Wang, *Angew. Chem. Int. Ed.*, 2010, **49**, 441-444.

[R5] J. S. Zhang, G. G. Zhang, X. F. Chen, L. Mohlman, G. Dolega, G. Lipner, M. Antonietti, S. Blechert and X. C. Wang, *Angew. Chem. Int. Ed.*, 2012, **51**, 3183-3187.

[R6] M. W. Zhang and X. C. Wang, *Energy Environ. Sci.*, 2014, **7**, 1902–1906.

[R7] J. S. Zhang, M. W. Zhang, S. Lin, X. Z. Fu and X. C. Wang, *J. Catal.*, 2014, **310**, 24-30.

[R8] Y. Zhang, L. L. Wu, X. Y. Zhao, Y. N. Zhao, H. Q. Tan, X. Zhao, Y. Y. Ma, Z. Zhao, S. Y. Song, Y. H. Wang and Y. G. Li, *Adv. Energy Mater.* 2018, **8**, 1801139.

**Table S4** The fitted parameters of fluorescence lifetime for CN and M<sub>25</sub>CN. ( $y=A_1 \cdot \exp(-x/\tau_1) + A_2 \cdot \exp(-x/\tau_2) + B$ )

| Sample             | $\tau_1$ /ns (rel.%) | $\tau_2$ /ns (rel.%) | A <sub>1</sub> | A <sub>2</sub> | $\tau$ /ns |
|--------------------|----------------------|----------------------|----------------|----------------|------------|
| CN                 | 3.63(0.58)           | 19.44(0.42)          | 617.28         | 83.67          | 10.27      |
| M <sub>25</sub> CN | 2.26(0.61)           | 10.11(0.39)          | 944.38         | 133.82         | 5.32       |
